# Supplementary material for: Computational Prediction of Broadly Neutralizing HIV-1 Antibody Epitopes from Neutralization Activity Data
Source: PubMed Central journal article supplement (PMC3846483; doi:10.1371/journal.pone.0080562), 2013-12-02
Supplement: pone.0080562.s001.pdf [file pone.0080562.s001.pdf]

| Isolate         | NCBI Accession | Subtype* | IC <sub>50</sub> / µg/ml |         |         |         |         |         |         |         |         |         |   |
|-----------------|----------------|----------|--------------------------|---------|---------|---------|---------|---------|---------|---------|---------|---------|---|
|                 |                |          | PGT 121                  | PGT 123 | PGT 125 | PGT 126 | PGT 127 | PGT 128 | PGT 130 | PGT 135 | PGT 143 | PGT 145 |   |
| 92RW009         | AY669700       | A        | 1.739                    | 15.680  | 0.144   | >50     | >50     | 0.812   | 1.274   | >50     | 0.010   | 0.026   | † |
| 92RW008         | AY669703       | A        | 0.003                    | 0.003   | 0.004   | 0.008   | 0.012   | 0.003   | 0.089   | 1.417   | 0.385   | 0.400   | † |
| 92RW020         | AY669706       | A        | 0.004                    | 0.002   | 0.004   | 0.006   | 0.010   | 0.005   | 0.039   | 0.067   | >50     | 0.997   | † |
| 92RW024         | AY669699       | A        | >50                      | >50     | 35.530  | 41.995  | >50     | >50     | >50     | >50     | 0.122   | 0.069   | † |
| 92RW026         | AY669702       | A        | 0.014                    | 0.012   | 0.007   | 0.008   | 0.024   | 0.010   | 0.037   | 0.068   | 5.364   | 1.453   | † |
| 92UG031         | AY669701       | A        | >50                      | >50     | >50     | >50     | >50     | >50     | >50     | >50     | 0.095   | 3.220   | † |
| 92UG037         | AY494974       | A        | 0.031                    | 0.023   | 0.005   | 0.011   | 0.014   | 0.006   | 0.061   | 3.672   | 0.854   | 3.148   | † |
| 93RW029         | AY669697       | A        | >50                      | >50     | >50     | >50     | >50     | >50     | 34.264  | >50     | 0.053   | >50     | † |
| 93UG077         | AY669704       | A        | 0.019                    | 0.028   | 0.012   | 0.020   | 0.055   | 0.014   | 21.392  | >50     | >50     | >50     | † |
| 94UG103         | AY669705       | A        | 2.518                    | 0.678   | 0.008   | 0.008   | 0.017   | 0.011   | 1.402   | >50     | >50     | 0.331   | † |
| Q23.17          | AF004885       | A        | <0.001                   | <0.001  | 0.003   | 0.009   | 0.006   | 0.009   | 0.118   | 41.647  | 0.308   | 1.317   | † |
| Q259.d2.17      | AF407152       | A        | 15.379                   | >50     | >50     | >50     | >50     | >50     | 0.320   | >50     | >50     | 44.232  | † |
| Q461.e2         | AF407156       | A        | >50                      | >50     | >50     | >50     | >50     | >50     | 3.007   | >50     | 35.248  | 7.801   | † |
| Q769.d22        | AF407158       | A        | >50                      | >50     | >50     | >50     | >50     | >50     | 1.234   | >50     | >50     | 0.260   | † |
| Q842.d12        | AF407160       | A        | 0.005                    | 0.017   | 0.001   | 0.287   | 1.000   | 0.008   | 0.003   | >50     | 0.028   | 0.032   | † |
| MS208.A1        | DQ187010       | A        | >50                      | >50     | >50     | >50     | >50     | >50     | >50     | 0.403   | 0.183   | 0.334   | † |
| 0260.v5.c36     | HM215256       | A        | 0.053                    | 0.036   | 0.053   | 0.093   | 0.083   | 0.058   | 1.319   | 0.792   | >50     | >50     | † |
| 0330.v4.c3      | HM215257       | A        | 0.050                    | 0.052   | >50     | 16.952  | >50     | 1.604   | >50     | >50     | 0.021   | 0.990   | † |
| 191084 B7-19    | HM215266       | A (T/F)  | 0.011                    | 0.008   | 4.725   | 1.218   | 0.497   | 0.022   | >50     | 0.058   | 0.023   | 0.028   | † |
| 191955 A11      | HM215272       | A (T/F)  | >50                      | >50     | >50     | >50     | >50     | 14.195  | 1.082   | >50     | 0.002   | <0.001  | † |
| 9004SS A3 4     | HM215350       | A (T/F)  | <0.001                   | <0.001  | <0.001  | <0.001  | 0.006   | 0.002   | 0.078   | >50     | 0.320   | 0.018   | † |
| 94KE105         | AY669768       | AC       | 0.029                    | 0.024   | 0.004   | 0.006   | 0.023   | 0.007   | 0.004   | 0.063   | 0.368   | 1.317   | † |
| 3301.v1.c24     | HM215294       | AC       | 0.008                    | 0.005   | 11.393  | 0.446   | 0.262   | 0.067   | 0.458   | >50     | 0.102   | 0.219   | † |
| 6041.v3.c23     | HM215321       | AC       | >50                      | >50     | >50     | >50     | >50     | >50     | >50     | >50     | >50     | 0.964   | † |
| 6540.v4.c1      | HM215330       | AC       | >50                      | >50     | >50     | >50     | >50     | 11.798  | 1.025   | >50     | 0.032   | 0.080   | † |
| 6545.v4.c1      | HM215332       | AC       | >50                      | >50     | >50     | >50     | >50     | >50     | 15.991  | >50     | 0.032   | 0.114   | † |
| 0815.v3.c3      | HM215260       | ACD      | 0.025                    | 0.012   | 0.029   | 0.068   | 0.116   | 0.030   | 0.560   | >50     | >50     | >50     | † |
| 3103.v3.c10     | HM215288       | ACD      | 0.009                    | 0.009   | 0.020   | 0.030   | 0.031   | 0.014   | 0.148   | 2.002   | 5.755   | 0.043   | † |
| 92TH021         | AY669775       | AE       | >50                      | >50     | 0.006   | 0.197   | >50     | 0.010   | 0.009   | >50     | 0.003   | 0.013   | † |
| CMU02           | AY669779       | AE       | >50                      | >50     | >50     | >50     | >50     | >50     | >50     | >50     | >50     | 1.425   | † |
| 92BR020         | AY669718       | B        | 0.014                    | 0.008   | 0.016   | 0.015   | 0.059   | 0.009   | 1.395   | 0.073   | 25.892  | 1.051   | † |
| 93TH305         | AY669729       | B        | 0.007                    | 0.008   | 0.008   | 0.013   | 0.017   | 0.006   | 0.021   | >50     | 17.270  | 0.032   | † |
| APV-13          | DQ869019       | B        | 0.251                    | 0.138   | 0.007   | 0.012   | 0.026   | 0.008   | 0.052   | 0.716   | >50     | 0.337   | † |
| APV-17          | DQ869023       | B        | 0.066                    | 0.114   | 8.063   | 0.353   | 10.378  | 0.016   | 10.661  | >50     | 1.108   | 0.488   | † |
| APV-6           | DQ869030       | B        | 0.018                    | 0.023   | 0.021   | 0.007   | 0.040   | 0.007   | >50     | >50     | 13.968  | 0.104   | † |
| JR-FL           | U63632         | B        | 0.021                    | 0.014   | 0.009   | 0.014   | 0.029   | 0.007   | 0.046   | >50     | >50     | 30.401  | † |
| NL4-3           | AF324493       | B        | >50                      | >50     | >50     | >50     | >50     | >50     | 8.034   | >50     | >50     | 0.006   | † |
| QH0692          | AF277065       | B        | 0.823                    | 0.158   | 0.048   | 0.048   | 0.129   | 0.029   | >50     | >50     | >50     | >50     | † |
| SF162env        | EU123924       | B        | 0.005                    | 0.005   | 0.004   | 0.003   | 0.019   | 0.007   | 0.007   | 0.023   | >50     | >50     | † |
| 6535.3          | AY835438       | B        | 0.002                    | 0.001   | 0.007   | 0.008   | 0.011   | 0.004   | 0.025   | >50     | >50     | >50     | † |
| QH0692.42       | AY835439       | B        | 0.302                    | 0.092   | 0.025   | 0.023   | 0.098   | 0.029   | 1.121   | >50     | >50     | >50     | † |
| SC422661.8      | AY835441       | B        | 0.038                    | 0.027   | >50     | 0.097   | >50     | 1.078   | >50     | 0.477   | 3.799   | 0.024   | † |
| PVO.4           | AY835444       | B        | 0.098                    | 0.061   | 0.021   | 0.020   | 0.081   | 0.011   | 2.364   | >50     | 0.111   | 0.192   | † |
| TRO.11          | AY835445       | B        | 0.005                    | 0.006   | 0.124   | 0.051   | 0.096   | 0.019   | 0.172   | 0.030   | 0.996   | 0.040   | † |
| AC10.0.29       | AY835446       | B        | 0.024                    | 0.016   | >50     | 0.317   | >50     | 0.008   | 0.245   | >50     | 0.042   | 0.010   | † |
| RHPA4259.7      | AY835447       | B        | 0.015                    | 0.013   | 0.027   | 0.025   | 1.242   | 0.026   | 0.198   | >50     | 0.054   | 0.029   | † |
| THRO4156.18     | AY835448       | B        | >50                      | >50     | >50     | >50     | >50     | >50     | >50     | >50     | 0.011   | 0.010   | † |
| REJO4541.67     | AY835449       | B        | 4.774                    | >50     | >50     | >50     | >50     | >50     | 4.092   | >50     | 9.157   | <0.001  | † |
| TRJO4551.58     | AY835450       | B        | 1.314                    | 1.023   | 0.015   | 0.027   | 0.051   | 0.018   | 0.038   | >50     | >50     | >50     | † |
| WITO4160.33     | AY835451       | B        | 0.334                    | 0.429   | >50     | 6.108   | >50     | >50     | 1.797   | 5.842   | <0.001  | <0.001  | † |
| CAAN5342.A2     | AY835452       | B        | 0.007                    | 0.008   | 2.236   | 0.096   | 0.244   | 0.514   | 17.497  | 2.561   | >50     | 6.675   | † |
| 1006_11_C3_1601 | EU289183       | B (T/F)  | 0.002                    | 0.004   | 3.502   | 0.021   | 0.079   | 0.011   | 1.190   | >50     | >50     | >50     | † |

|                    |          |          |        |        |        |        |        |        |        |        |        |        |
|--------------------|----------|----------|--------|--------|--------|--------|--------|--------|--------|--------|--------|--------|
| 1012_11_TC21_3257  | EU289184 | B (T/F)  | 0.003  | 0.002  | 6.354  | 0.014  | 0.482  | 0.011  | 7.830  | 34.894 | 0.008  | 0.009  |
| 1054_07_TC4_1499   | EU289185 | B (T/F)  | 0.064  | 0.051  | >50    | 21.351 | >50    | 0.035  | 0.012  | >50    | >50    | >50    |
| 1056_10_TA11_1826  | EU289186 | B (T/F)  | 0.004  | <0.001 | <0.001 | <0.001 | 0.004  | <0.001 | <0.001 | >50    | 0.289  | 0.230  |
| 62357_14_D3_4589   | EU289189 | B (T/F)  | 2.597  | 1.190  | >50    | 22.492 | >50    | 1.144  | 0.783  | >50    | >50    | >50    |
| 6240_08_TA5_4622   | EU289190 | B (T/F)  | 0.033  | 0.015  | 0.354  | 0.098  | 0.061  | 0.019  | >50    | 22.623 | >50    | >50    |
| 6244_13_B5_4576    | EU289191 | B (T/F)  | 0.061  | 0.068  | 0.011  | 0.033  | 0.050  | 0.020  | 0.141  | 0.112  | >50    | 7.266  |
| SC05_8C11_2344     | EU289200 | B (T/F)  | 0.019  | 0.015  | 0.193  | 0.026  | 0.057  | 0.017  | 2.099  | 7.940  | 0.540  | 0.093  |
| WEAU_d15_410_5017  | EU289202 | B (T/F)  | 0.026  | 0.022  | 0.209  | 0.029  | 0.098  | 0.032  | 0.824  | 0.237  | >50    | 1.951  |
| CNE17              | HM215403 | BC       | 7.600  | 25.119 | 38.130 | 5.588  | 13.532 | 0.432  | >50    | >50    | 0.005  | 0.091  |
| CNE19              | HM215405 | BC       | 0.008  | 0.833  | >50    | >50    | >50    | >50    | >50    | 0.008  | >50    | 0.103  |
| CNE20              | HM215406 | BC       | <0.001 | 0.002  | 0.010  | 0.003  | 0.002  | 0.001  | 0.002  | 0.003  | >50    | 0.318  |
| CNE21              | HM215407 | BC       | 0.007  | 0.004  | 0.010  | 0.013  | 0.017  | 0.010  | 0.024  | 0.035  | 0.003  | <0.001 |
| CNE30              | HM215411 | BC       | >50    | >50    | >50    | >50    | >50    | >50    | 6.221  | >50    | 5.399  | 4.660  |
| CNE52              | HM215416 | BC       | 2.045  | 1.095  | >50    | >50    | >50    | >50    | >50    | 43.687 | >50    | 0.020  |
| CNE53              | HM215417 | BC       | 0.007  | 0.003  | 1.213  | 0.065  | 0.094  | 0.010  | 21.555 | 0.033  | 0.002  | 0.006  |
| CNE58              | HM215421 | BC       | >50    | >50    | >50    | 1.591  | >50    | 13.768 | >50    | >50    | 0.014  | 0.183  |
| 93IN905            | AY669742 | C        | 0.005  | 0.004  | 0.009  | 0.015  | 0.024  | 0.009  | 0.020  | 0.011  | 0.002  | 0.002  |
| 93MW959            | AY669739 | C        | 0.013  | 0.011  | 37.481 | 9.441  | 6.951  | 0.045  | 8.548  | >50    | 0.002  | 1.203  |
| 97ZA012            | AY669741 | C        | 0.002  | 0.002  | 2.465  | 0.042  | >50    | 0.019  | 1.318  | >50    | >50    | 0.915  |
| 98IN022            | AY669748 | C        | 0.007  | 0.011  | 22.057 | 0.279  | 19.189 | 0.014  | >50    | 0.014  | 0.001  | 0.005  |
| ZM53M.PB12         | AY423984 | C        | <0.001 | 0.406  | >50    | >50    | >50    | >50    | >50    | >50    | 0.011  | 0.367  |
| ZM135M.PL10a       | AY424079 | C        | 0.716  | 1.185  | >50    | >50    | >50    | >50    | >50    | >50    | >50    | >50    |
| ZM109F.PB4         | AY424138 | C        | 8.639  | >50    | >50    | >50    | >50    | >50    | >50    | >50    | >50    | 0.042  |
| ZM249M.PL1         | DQ388514 | C        | >50    | >50    | >50    | >50    | >50    | 39.657 | >50    | >50    | 0.411  | 1.442  |
| ZM197M.PB7         | DQ388515 | C        | >50    | >50    | >50    | >50    | >50    | >50    | >50    | >50    | 0.242  | 0.628  |
| ZM214M.PL15        | DQ388516 | C        | 0.460  | 0.180  | >50    | 2.075  | >50    | 1.498  | 2.500  | >50    | >50    | >50    |
| ZM233M.PB6         | DQ388517 | C        | 3.689  | 6.541  | >50    | >50    | >50    | >50    | >50    | 0.377  | 0.139  | 0.025  |
| Du156.12           | DQ411852 | C        | 0.004  | 0.004  | 0.218  | 0.068  | 0.047  | 0.017  | 0.121  | 20.357 | 0.023  | 0.001  |
| Du172.17           | DQ411853 | C        | 0.033  | 0.013  | 0.026  | 0.052  | 0.815  | 0.028  | 0.049  | >50    | >50    | >50    |
| Du422.1            | DQ411854 | C        | 0.039  | 0.035  | 0.056  | 0.091  | 0.083  | 0.039  | 0.085  | >50    | >50    | 22.564 |
| CAP45.2.00.G3      | DQ435682 | C        | 1.634  | >50    | >50    | >50    | >50    | >50    | >50    | >50    | 1.335  | 0.001  |
| CAP210.2.00.E8     | DQ435683 | C        | 26.301 | 43.636 | >50    | 41.472 | >50    | >50    | >50    | 45.003 | 0.570  | 37.807 |
| HIV-001428-2.42    | EF117266 | C        | 0.014  | 0.006  | >50    | 0.508  | 2.041  | 0.026  | 0.510  | 0.025  | >50    | 0.001  |
| HIV-0013095-2.11   | EF117267 | C        | >50    | >50    | >50    | >50    | >50    | >50    | >50    | >50    | >50    | 9.271  |
| HIV-16055-2.3      | EF117268 | C        | 0.153  | >50    | >50    | >50    | >50    | >50    | >50    | >50    | 0.001  | 0.003  |
| HIV-16845-2.22     | EF117269 | C        | 3.969  | 1.255  | >50    | >50    | >50    | 0.181  | >50    | 4.966  | >50    | >50    |
| 249M B10           | EU166866 | C (T/F)  | >50    | >50    | >50    | >50    | >50    | 7.868  | >50    | >50    | 0.302  | 0.947  |
| Ce703010054_2A2    | FJ443808 | C (T/F)  | >50    | >50    | >50    | >50    | >50    | >50    | >50    | >50    | >50    | >50    |
| 7030102001E5(Rev-) | FJ443999 | C (T/F)  | 0.009  | 0.009  | 0.008  | 0.008  | 0.190  | 0.007  | 0.289  | >50    | >50    | >50    |
| Ce704809221_1B3    | FJ444103 | C (T/F)  | 0.025  | 0.127  | 0.362  | 0.129  | 0.128  | 0.026  | 0.408  | >50    | 0.124  | 0.102  |
| Ce0393_C3          | FJ444215 | C (T/F)  | >50    | >50    | >50    | >50    | >50    | >50    | >50    | >50    | >50    | 0.112  |
| Ce0682_E4          | FJ444325 | C (T/F)  | >50    | >50    | >50    | >50    | >50    | >50    | >50    | >50    | 0.256  | 33.578 |
| Ce1086_B2          | FJ444395 | C (T/F)  | <0.001 | 0.092  | >50    | >50    | >50    | >50    | >50    | >50    | >50    | >50    |
| Ce1172_H1          | FJ444421 | C (T/F)  | 0.011  | 0.008  | 0.014  | 0.020  | 0.024  | 0.013  | 0.056  | >50    | 22.295 | 0.260  |
| Ce1176_A3          | FJ444437 | C (T/F)  | 0.013  | 0.010  | 0.022  | 0.045  | 0.035  | 0.009  | 0.041  | 25.597 | >50    | >50    |
| 1394C9G1(Rev-)     | FJ444529 | C (T/F)  | 0.264  | 2.201  | 0.280  | 0.049  | 0.043  | 0.011  | 0.041  | 0.072  | 0.010  | 0.001  |
| Ce2010_F5          | FJ444561 | C (T/F)  | >50    | >50    | >50    | >50    | >50    | >50    | >50    | >50    | >50    | >50    |
| Ce2060_G9          | FJ444600 | C (T/F)  | >50    | >50    | >50    | >50    | >50    | >50    | >50    | >50    | 0.216  | 0.016  |
| 246F_C1G           | FJ496194 | C (T/F)  | 0.041  | 0.044  | >50    | 31.534 | >50    | 0.005  | >50    | >50    | >50    | >50    |
| ZM247v1(Rev-)      | FJ496204 | C (T/F)  | 0.028  | 0.021  | 0.267  | 0.171  | 0.069  | 0.021  | 0.030  | >50    | 8.567  | 7.190  |
| BF1266.431a        | HM215360 | C (T/F)  | >50    | >50    | >50    | >50    | >50    | >50    | 0.408  | >50    | >50    | 1.345  |
| 3817.v2.c59        | HM215310 | CD       | 18.888 | >50    | 1.472  | 0.479  | 0.972  | 0.003  | 3.192  | >50    | >50    | >50    |
| 6480.v4.c25        | HM215329 | CD       | <0.001 | <0.001 | 0.063  | 0.035  | 0.047  | 0.003  | 0.392  | 0.577  | >50    | >50    |
| 6811.v7.c18        | HM215340 | CD       | <0.001 | <0.001 | 4.105  | 0.323  | 0.229  | 0.003  | 0.156  | 0.052  | >50    | >50    |
| 6952.v1.c20        | HM215343 | CD       | 0.056  | 0.025  | >50    | >50    | >50    | >50    | >50    | 0.017  | >50    | 3.120  |
| C3347.c11          | AF259954 | CRF01_AE | >50    | >50    | 2.204  | 38.418 | >50    | 0.001  | 0.002  | >50    | >50    | 0.005  |
| BJOX009000.02.4    | HM215372 | CRF01_AE | 2.858  | >50    | <0.001 | 0.012  | 0.143  | <0.001 | 0.006  | >50    | 0.070  | 0.117  |

|                 |          |                |        |        |        |        |        |        |       |       |        |          |
|-----------------|----------|----------------|--------|--------|--------|--------|--------|--------|-------|-------|--------|----------|
| CNE5            | HM215415 | CRF01 AE       | >50    | >50    | 0.005  | 0.777  | >50    | 0.018  | 0.008 | >50   | 0.011  | 0.001    |
| CNE8            | HM215427 | CRF01 AE       | >50    | >50    | 0.016  | 0.056  | 0.397  | 0.019  | 0.030 | >50   | 4.031  | 0.272    |
| BJOX010000.06.2 | HM215373 | CRF01 AE (T/F) | >50    | >50    | >50    | >50    | >50    | 4.817  | 0.031 | >50   | >50    | >50      |
| BJOX015000.11.5 | HM215377 | CRF01 AE (T/F) | >50    | >50    | 0.001  | 0.473  | 4.062  | 0.001  | 0.003 | 0.489 | >50    | >50      |
| BJOX025000.01.1 | HM215386 | CRF01 AE (T/F) | >50    | >50    | >50    | >50    | >50    | >50    | >50   | >50   | >50    | 6.632    |
| BJOX028000.10.3 | HM215389 | CRF01 AE (T/F) | >50    | >50    | 0.015  | 0.018  | 0.058  | 0.024  | 0.025 | >50   | >50    | >50      |
| 263-8           | EU513182 | CRF02 AG       | 0.648  | 0.416  | >50    | 3.143  | >50    | 0.342  | >50   | >50   | 3.340  | 32.071   |
| T255-34         | EU513184 | CRF02 AG       | 18.695 | >50    | >50    | >50    | >50    | >50    | >50   | >50   | 45.292 | >50      |
| T257-31         | EU513185 | CRF02 AG       | >50    | >50    | >50    | >50    | >50    | >50    | 0.041 | >50   | 4.002  | 5.177    |
| 211-9           | EU513187 | CRF02 AG       | 0.852  | 0.931  | 7.670  | 0.046  | 4.480  | 0.062  | >50   | >50   | 0.043  | 0.129    |
| T250-4          | EU513189 | CRF02 AG       | <0.001 | 0.003  | 0.005  | 0.007  | 0.007  | <0.001 | 0.004 | >50   | 0.022  | 0.002    |
| 235-47          | EU513195 | CRF02 AG       | 0.137  | 0.555  | >50    | >50    | >50    | >50    | >50   | 3.580 | >50    | 3.212    |
| T251-18         | EU513196 | CRF02 AG       | 29.016 | 14.316 | >50    | >50    | >50    | >50    | >50   | >50   | >50    | 0.351    |
| T278-50         | EU513198 | CRF02 AG       | >50    | >50    | >50    | >50    | >50    | 0.031  | 0.142 | >50   | >50    | 10.324   |
| 928-28          | EU513199 | CRF02 AG       | 44.189 | >50    | >50    | >50    | >50    | >50    | >50   | >50   | >50    | >50      |
| 98CN009         | AY669747 | CRF07 BC       | 0.009  | 0.007  | 0.030  | 0.019  | 0.090  | 0.025  | 0.136 | 0.071 | 10.206 | 0.136 †  |
| 98CN006         | AY669745 | CRF08 BC       | 0.010  | 0.008  | 0.201  | 0.046  | 0.067  | 0.015  | 0.258 | 0.429 | >50    | >50 †    |
| 92UG001         | AY669754 | D              | >50    | >50    | >50    | >50    | >50    | >50    | >50   | >50   | >50    | >50 †    |
| 92UG005         | AY669758 | D              | 18.292 | 9.794  | >50    | 0.037  | 1.107  | 0.018  | 0.959 | >50   | >50    | >50 †    |
| 92UG024         | AY669760 | D              | >50    | >50    | >50    | >50    | >50    | >50    | >50   | 0.010 | >50    | 1.600 †  |
| 92UG046         | AY669757 | D              | >50    | >50    | >50    | >50    | >50    | >50    | >50   | >50   | >50    | >50 †    |
| 94UG114         | AY494966 | D              | 0.004  | 0.005  | 0.349  | 0.038  | 7.091  | 0.083  | >50   | 1.289 | >50    | 20.113 † |
| 3016.v5.c45     | HM215283 | D              | >50    | >50    | >50    | >50    | >50    | >50    | >50   | >50   | >50    | >50      |
| A07412M1.vrc12  | HM215357 | D              | 0.009  | 0.194  | >50    | >50    | >50    | >50    | >50   | 6.791 | 7.260  | 0.002    |
| 191821 E6 1     | HM215270 | D (T/F)        | >50    | >50    | 0.393  | 0.006  | 21.783 | 0.010  | 0.010 | 0.035 | >50    | 0.186    |
| P0402 c2 11     | EU885759 | G              | 0.005  | 0.004  | >50    | 0.169  | >50    | 0.007  | 0.116 | >50   | 0.022  | 0.009    |
| X1193 c1        | EU885761 | G              | 0.016  | 0.011  | 0.002  | 0.014  | 0.010  | >50    | 0.011 | 0.017 | 0.053  | 0.013    |
| X1254 c3        | EU885762 | G              | 0.014  | 0.002  | 0.004  | 0.009  | 0.014  | >50    | 0.042 | 1.912 | >50    | 5.597    |
| X2088 c9        | EU885764 | G              | 0.003  | 0.011  | >50    | >50    | >50    | >50    | >50   | 0.007 | >50    | >50      |
| X2131 C1 B5     | FJ817368 | G              | 0.004  | 0.005  | 0.214  | 0.059  | 0.190  | >50    | 0.094 | 0.007 | 0.186  | 0.018    |
| P1981 C5 3      | FJ817369 | G              | <0.001 | <0.001 | <0.001 | <0.001 | <0.001 | 0.019  | 2.630 | >50   | 24.661 | 5.413    |
| X1632 S2 B10    | FJ817370 | G              | >50    | >50    | >50    | >50    | >50    | >50    | 0.293 | >50   | 17.761 | 0.012    |

\* (T/F): Transmitted / Founder Virus  
† Neutralization data taken from Ref. [5]
