# Supplementary material for: Computational Prediction of Broadly Neutralizing HIV-1 Antibody Epitopes from Neutralization Activity Data
Source: PubMed Central journal article supplement (PMC3846483; doi:10.1371/journal.pone.0080562), 2013-12-02
Supplement: pone.0080562.s002.pdf [file pone.0080562.s002.pdf]

| bnMAb   | Positions           |     |     |     |      | Experiment |
|---------|---------------------|-----|-----|-----|------|------------|
|         | Ensemble classifier |     |     |     |      |            |
|         | 25%                 | 50% | 75% | 90% | 100% |            |
| PGT 121 | -                   | 332 | 332 | 332 | 332  | 332        |
|         |                     | 580 |     | 843 |      | 334        |
|         |                     | 592 |     |     |      |            |
|         |                     |     |     |     |      |            |
| PGT 123 | -                   | 332 | 330 | 330 | 330  | 325        |
|         |                     | 334 | 332 | 332 | 332  | 332        |
|         |                     |     | 334 | 334 | 334  | 334        |
|         |                     |     |     |     |      |            |
| PGT 125 | -                   | -   | 332 | -   | -    | 301        |
|         |                     |     |     |     |      | 303        |
|         |                     |     |     |     |      |            |
|         |                     |     |     |     |      |            |
| PGT 126 | 588                 | -   | 297 | 332 | 297  | 301        |
|         |                     |     |     | 334 | 332  | 303        |
|         |                     |     |     |     | 334  | 332        |
|         |                     |     |     |     |      | 334        |
|         |                     |     |     |     |      |            |
| PGT 127 | 588                 | -   | 332 | 332 | 332  | 301        |
|         |                     |     |     | 334 | 334  | 303        |
|         |                     |     |     |     |      | 332        |
|         |                     |     |     |     |      | 334        |
|         |                     |     |     |     |      |            |
| PGT 128 | -                   | -   | 332 | 332 | 332  | 303        |
|         |                     |     |     |     | 334  |            |
|         |                     |     |     |     |      |            |
|         |                     |     |     |     |      |            |
| PGT 130 | -                   | 373 | -   | -   | 792  | 301        |
|         |                     | 793 |     |     |      | 303        |
|         |                     |     |     |     |      | 307        |
|         |                     |     |     |     |      | 309        |
|         |                     |     |     |     |      | 324        |
|         |                     |     |     |     |      | 325        |
|         |                     |     |     |     |      | 423        |
|         |                     |     |     |     |      |            |
| PGT 135 | -                   | -   | -   | -   | 334  | 297        |
|         |                     |     |     |     |      | 330        |
|         |                     |     |     |     |      | 332        |
|         |                     |     |     |     |      | 334        |
|         |                     |     |     |     |      | 392        |
|         |                     |     |     |     |      | 394        |
|         |                     |     |     |     |      |            |
| PGT 143 | -                   | 166 | 166 | 166 | 166  | 160        |
|         |                     |     |     |     |      | 166        |
|         |                     |     |     |     |      |            |
| PGT 145 | -                   | -   | 160 | 166 | 160  | 160        |
|         |                     |     | 166 |     | 166  |            |
|         |                     |     |     |     |      |            |
