# Supplementary material for: Computational Prediction of Broadly Neutralizing HIV-1 Antibody Epitopes from Neutralization Activity Data
Source: PubMed Central journal article supplement (PMC3846483; doi:10.1371/journal.pone.0080562), 2013-12-02
Supplement: pone.0080562.s003.pdf [file pone.0080562.s003.pdf]

| bnMAB   | Positions           |               |                |                     |            |
|---------|---------------------|---------------|----------------|---------------------|------------|
|         | Fisher's Exact Test |               |                | Ensemble Classifier | Experiment |
|         | $\alpha=0.05$       | $\alpha=0.01$ | $\alpha=0.001$ |                     |            |
| PGT 121 | 147                 | 330           | 332            | 332                 | 332        |
|         | 152                 | 332           | 334            |                     | 334        |
|         | 277                 | 334           |                |                     |            |
|         | 307                 | 429           |                |                     |            |
|         | 323                 | 442           |                |                     |            |
|         | 330                 | 452           |                |                     |            |
|         | 332                 | 475           |                |                     |            |
|         | 334                 | 602           |                |                     |            |
|         | 346                 | 619           |                |                     |            |
|         | 362                 | 720           |                |                     |            |
|         | 363                 |               |                |                     |            |
|         | 372                 |               |                |                     |            |
|         | 375                 |               |                |                     |            |
|         | 429                 |               |                |                     |            |
|         | 442                 |               |                |                     |            |
|         | 452                 |               |                |                     |            |
|         | 475                 |               |                |                     |            |
|         | 507                 |               |                |                     |            |
|         | 519                 |               |                |                     |            |
|         | 591                 |               |                |                     |            |
|         | 592                 |               |                |                     |            |
|         | 602                 |               |                |                     |            |
|         | 613                 |               |                |                     |            |
|         | 619                 |               |                |                     |            |
|         | 629                 |               |                |                     |            |
|         | 641                 |               |                |                     |            |
|         | 645                 |               |                |                     |            |
|         | 647                 |               |                |                     |            |
|         | 720                 |               |                |                     |            |
|         | 736                 |               |                |                     |            |
|         | 742                 |               |                |                     |            |
|         | 796                 |               |                |                     |            |
|         | 837                 |               |                |                     |            |
|         | 843                 |               |                |                     |            |
|         |                     |               |                |                     |            |
| PGT 123 | 8                   | 330           | 330            | 330                 | 325        |
|         | 136                 | 332           | 332            | 332                 | 332        |
|         | 147                 | 334           | 334            | 334                 | 334        |
|         | 151                 | 372           |                |                     |            |
|         | 152                 | 375           |                |                     |            |
|         | 277                 | 429           |                |                     |            |
|         | 292                 | 452           |                |                     |            |
|         | 315                 | 475           |                |                     |            |
|         | 330                 | 507           |                |                     |            |
|         | 332                 | 519           |                |                     |            |
|         | 334                 | 591           |                |                     |            |
|         | 346                 | 592           |                |                     |            |
|         | 352                 | 602           |                |                     |            |
|         | 362                 | 619           |                |                     |            |
|         | 372                 | 629           |                |                     |            |
|         | 375                 | 720           |                |                     |            |
|         | 429                 |               |                |                     |            |
|         | 442                 |               |                |                     |            |

|         |     |     |     |     |     |
|---------|-----|-----|-----|-----|-----|
|         | 446 |     |     |     |     |
|         | 452 |     |     |     |     |
|         | 475 |     |     |     |     |
|         | 507 |     |     |     |     |
|         | 519 |     |     |     |     |
|         | 591 |     |     |     |     |
|         | 592 |     |     |     |     |
|         | 602 |     |     |     |     |
|         | 612 |     |     |     |     |
|         | 613 |     |     |     |     |
|         | 619 |     |     |     |     |
|         | 629 |     |     |     |     |
|         | 647 |     |     |     |     |
|         | 720 |     |     |     |     |
|         | 740 |     |     |     |     |
|         | 746 |     |     |     |     |
|         | 796 |     |     |     |     |
|         | 797 |     |     |     |     |
|         | 843 |     |     |     |     |
| PGT 125 | -   | -   | -   | -   | 301 |
|         |     |     |     |     | 303 |
| PGT 126 | 332 | 332 | 332 | 297 | 301 |
|         | 334 | 334 | 334 | 332 | 303 |
|         |     |     |     | 334 | 332 |
|         |     |     |     |     | 334 |
| PGT 127 | 330 | 332 | -   | 332 | 301 |
|         | 332 | 334 |     | 334 | 303 |
|         | 334 |     |     |     | 332 |
|         |     |     |     |     | 334 |
| PGT 128 | 332 | 332 | -   | 332 | 303 |
|         | 334 | 334 |     | 334 |     |
| PGT 130 | 471 | -   | -   | 792 | 301 |
|         | 500 |     |     |     | 303 |
|         | 792 |     |     |     | 307 |
|         |     |     |     |     | 309 |
|         |     |     |     |     | 324 |
|         |     |     |     |     | 325 |
|         |     |     |     |     | 423 |
| PGT 135 | 334 | -   | -   | 334 | 297 |
|         |     |     |     |     | 330 |
|         |     |     |     |     | 332 |
|         |     |     |     |     | 334 |
|         |     |     |     |     | 392 |
|         |     |     |     |     | 394 |
| PGT 143 | 166 | 166 | 166 | 166 | 160 |
|         |     |     |     |     | 166 |
| PGT 145 | 160 | -   | -   | 160 | 160 |
|         | 166 |     |     | 166 |     |
