# Supplementary material for: Computational Prediction of Broadly Neutralizing HIV-1 Antibody Epitopes from Neutralization Activity Data
Source: PubMed Central journal article supplement (PMC3846483; doi:10.1371/journal.pone.0080562), 2013-12-02
Supplement: pone.0080562.s004.pdf [file pone.0080562.s004.pdf]

| bnMAb   | MI IC <sub>50</sub> cutoff / µg/ml |          |          |           |           |           |
|---------|------------------------------------|----------|----------|-----------|-----------|-----------|
|         | <i>0.1</i>                         | <i>1</i> | <i>5</i> | <i>10</i> | <i>20</i> | <i>50</i> |
| PGT 121 | 330                                | 330      | 332      | 332       | 332       | 330       |
|         | 332                                | 332      |          |           |           | 332       |
|         | 843                                |          |          |           |           |           |
|         |                                    |          |          |           |           |           |
| PGT 123 | 330                                | 330      | 330      | 330       | 330       | 330       |
|         | 332                                | 332      | 332      | 332       | 332       | 332       |
|         | 334                                | 334      | 334      | 334       | 334       | 334       |
|         | 843                                |          |          |           |           |           |
|         |                                    |          |          |           |           |           |
| PGT 125 | -                                  | -        | -        | -         | 82        | -         |
|         |                                    |          |          |           |           |           |
| PGT 126 | 332                                | 332      | 332      | 297       | 297       | 297       |
|         | 334                                | 334      | 334      | 332       | 332       | 332       |
|         |                                    |          |          | 334       | 334       | 334       |
|         |                                    |          |          |           |           |           |
| PGT 127 | 332                                | 332      | 332      | 332       | 330       | 332       |
|         | 334                                | 334      | 334      | 334       | 332       | 334       |
|         |                                    |          |          |           | 334       |           |
|         |                                    |          |          |           |           |           |
| PGT 128 | 332                                | 332      | 153      | 332       | 332       | 332       |
|         |                                    | 334      | 332      | 334       |           |           |
|         |                                    |          | 334      |           |           |           |
|         |                                    |          |          |           |           |           |
| PGT 130 | -                                  | -        | 792      | 792       | -         | -         |
|         |                                    |          |          |           |           |           |
| PGT 135 | -                                  | -        | -        | 334       | 334       | 334       |
|         |                                    |          |          |           |           |           |
| PGT 143 | -                                  | 166      | 166      | 166       | 166       | 166       |
|         |                                    |          |          |           |           |           |
| PGT 145 | -                                  | 166      | 160      | 160       | 160       | 160       |
|         |                                    |          | 166      | 166       | 166       | 166       |
